## Comparison of four $\beta$ -glucuronidase and $\beta$ -galactosidase-based commercial culture methods used to detect *Escherichia coli* and total coliforms in water

Andrée F. Maheux, Vanessa Dion-Dupont, Sébastien Bouchard, Marc-Antoine Bisson, Michel G. Bergeron and Manuel J. Rodriguez

### ABSTRACT

The MI agar, Colilert<sup>®</sup>, Chromocult coliform<sup>®</sup> agar, and DC with BCIG agar chromogenic culture-based methods used to assess microbiological quality of drinking water were compared in terms of their ubiquity, sensitivity, ease of use, growth of atypical colonies and affordability. For ubiquity, 129 total coliform (representing 76 species) and 19 *Escherichia coli* strains were tested. Then, 635 1-L well water samples were divided into 100 mL subsamples for testing by all four methods. Test results showed that 70.5, 52.7, 36.4, and 23.3% of the non-*E. coli* total coliform strains and 94.7, 94.7, 89.5, and 89.5% of the 19 *E. coli* strains yielded a positive signal with the four methods, respectively. They also yielded a total coliform positive signal for 66.5, 51.7, 64.9, and 55.0% and an *E. coli* positive signal for 16.1, 14.8, 17.3, and 13.4% of the 635 well water samples tested, respectively. Results showed that Colilert<sup>®</sup> is the most expensive method tested in terms of reactants, yet it is the easiest to use. Large numbers of atypical colonies were also often observed on Chromocult coliform<sup>®</sup> and DC with BCIG, thereby challenging the target microorganism count. Thus, the MI agar method seems to be the best option for the assessment of drinking water quality.

**Key words** | Chromocult coliform<sup>®</sup> agar, Colilert<sup>®</sup>, DC with BCIG agar, drinking water, MI agar

**Andrée F. Maheux** (corresponding author)

**Vanessa Dion-Dupont**

**Sébastien Bouchard**

**Marc-Antoine Bisson**

**Manuel J. Rodriguez**

Chaire de recherche en eau potable de l'Université Laval,

Québec City (Québec),

Canada

E-mail: andree.maheux.3@ulaval.ca

**Andrée F. Maheux**

**Manuel J. Rodriguez**

École supérieure d'aménagement du territoire et de développement régional,

Université Laval,

Québec City (Québec),

Canada

**Vanessa Dion-Dupont**

**Sébastien Bouchard**

**Marc-Antoine Bisson**

Centre de recherche en aménagement et développement de l'Université Laval,

Québec City (Québec),

Canada

**Michel G. Bergeron**

Centre de recherche en infectiologie de

l'Université Laval, Axe Maladies infectieuses et immunitaires, Centre de recherche du CHU de

Québec,

Québec City (Québec),

Canada

**Michel G. Bergeron**

Département de microbiologie-infectiologie et

d'immunologie, Faculté de médecine,

Université Laval,

Québec City (Québec),

Canada

### INTRODUCTION

Methods based on the enzymatic properties of coliforms ( $\beta$ -galactosidase for total coliforms and  $\beta$ -glucuronidase enzymes for *Escherichia coli* detection) are used to assess drinking water quality. They were developed to diminish background effects of heterotrophic bacteria and circumvent the need for a confirmation stage required by both multiple-

tube fermentation and membrane filter techniques (Clark 1980; Evans *et al.* 1981; Means & Olson 1981; Seidler *et al.* 1981; Burlingame *et al.* 1984; APHA 2005). The  $\beta$ -galactosidase enzyme was chosen because conventional coliform monitoring is based on the detection of the presence of  $\beta$ -galactosidase. The  $\beta$ -glucuronidase enzyme was also chosen

because the gene encoding this enzyme (*uidA*) was found to be specific (Brenner *et al.* 1972) and present in more than 97% of *E. coli* isolates (Lupo & Halpern 1970; Martins *et al.* 1993).

The MI agar (MI; BD, Franklin Lakes, NJ, USA), Colilert<sup>®</sup> (IDEXX Laboratories, Westbrook, ME, USA), Chromocult Coliform<sup>®</sup> agar (Chromocult coliform<sup>®</sup>; Merk KGaA, Darmstadt, Germany) are three commercial test methods based on the determination of  $\beta$ -galactosidase and  $\beta$ -glucuronidase enzyme activities used to detect, within 24 h, total coliforms and *E. coli* in water samples. These three tests are easy to use, require no additional confirmatory step and provide a more rapid estimate of indicators of the bacteriological contamination of water compared to classical techniques (Brenner *et al.* 1993, 1996; Edberg *et al.* 1988; Horman & Hanninen 2006; Olstad *et al.* 2007; Pitkanen *et al.* 2007; Hallas *et al.* 2008; Mavridou *et al.* 2010; Boubetra *et al.* 2011). Different collections of strains were tested with each commercial  $\beta$ -galactosidase and  $\beta$ -glucuronidase-based test method to establish their ability to recover total coliforms and *E. coli* strains. All of these methods were found to be at least as efficient as classical reference methods in terms of specificity and sensitivity (Landre *et al.* 1998; Rice *et al.* 1990, 1991, 1993). However, the expression of the  $\beta$ -glucuronidase enzyme was found to be variable depending on the medium and technique used (Chang *et al.* 1989; Shadix & Rice 1991; Feng & Lampel 1994; Maheux *et al.* 2008).

Alternatively, DC with BCIG agar (DC + BCIG; Noegen corporation, Lansing, MI, USA) is formulated to differentiate *E. coli* from other coliforms. Similar to MI, Chromocult coliform<sup>®</sup>, and Colilert<sup>®</sup>, the DC + BCIG agar medium contains a chromogenic agent to detect  $\beta$ -glucuronidase enzyme activity. However, it does not contain a chromogenic agent to detect the  $\beta$ -galactosidase enzyme activity. Feng & Hartman (1982) showed that *E. coli* colonies could be distinguished from other coliforms on membrane filters and plates of violet red bile agar if MUG (4-methylumbelliferyl-beta-D-glucuronide) was incorporated into the culture media. According to this, total coliform colonies are pink on DC + BCIG agar with the exception of *E. coli*. Because of the low cost of this medium, DC + BCIG agar could be advantageous to assess drinking water quality. Unfortunately, the performance of DC + BCIG agar as compared to reference methods is not well documented.

In the Province of Québec, the *Programme d'accréditation des laboratoires d'analyse* ('Accreditation program of analytic laboratories'; PALA), is administered by the *Centre d'expertise en analyse environnementale du Québec* (CEAEQ), which certifies private, municipal and institutional laboratories. In 2010, the CEAEQ proposed amending their guidelines and since 2013 requires the measurement of the presence of *E. coli* rather than thermotolerant coliforms, as recommended in the United States and many European countries (AWWA 2005; Government of Quebec 2013). To comply with this new guideline, water testing companies must validate a new procedure able to detect the presence of *E. coli* rather than thermotolerant coliforms in drinking water. Plenty of methods, including MI, Chromocult coliform<sup>®</sup>, Colilert<sup>®</sup>, and DC + BCIG agar, are available to detect the presence of *E. coli* in water with high variability in cost. Currently, there is no study comparing these four methods using both pure cultures of bacteria and water samples.

In this study, we first used a collection of fecal and environmental bacteria isolated from different geographical origins to compare four commercial chromogenic test methods (MI, Colilert<sup>®</sup>, Chromocult coliform<sup>®</sup>, and DC + BCIG agar). To our knowledge, this is the first report on the comparison of these test methods, using a pure culture panel of this size. Secondly, we compared the four methods in terms of sensitivity using residential well water samples. Their ability to limit the growth of atypical colonies, ease of use and affordability were also compared. The results of this study will help analytical laboratories to choose the best method according to their own needs.

## MATERIALS AND METHODS

### Analytical comparison

### Bacterial strains

The ability of the four culture-based methods to detect non-*E. coli* total coliforms and *E. coli* strains was verified by using 129 total coliform (representing 76 species) and 19 *E. coli* strains of fecal and environmental origin (Tables 1 and 2). Species identification was reconfirmed using an

**Table 1** | Ability of MI agar, Colilert®, Chromocult coliform® agar, and DC agar with BCIG culture-based methods to detect non-*E. coli* total coliforms strains

| Strains (origin; n = 129)                                    | No. Reference | Test methods  |             |                           |                   |
|--------------------------------------------------------------|---------------|---------------|-------------|---------------------------|-------------------|
|                                                              |               | MI agar       | Colilert®   | Chromocult coliform® agar | DC agar with BCIG |
| <i>Budvicia aquatica</i> (environmental)                     | ATCC 35567    | –             | Transparent | –                         | –                 |
| <i>Buttiauxella agretis</i> (environmental)                  | ATCC 33320    | Fluorescent   | Yellow      | Purple                    | Pink              |
| <i>Cedeca davisae</i> (clinical)                             | ATCC 33431    | Unfluorescent | Transparent | Transparent               | Transparent       |
| <i>Cedeca lapagei</i> (clinical)                             | ATCC 33432    | Fluorescent   | Pale yellow | Grey                      | Transparent       |
| <i>Cedeca neteri</i> (clinical)                              | ATCC 33855    | Fluorescent   | Pale yellow | Grey                      | Pink              |
| <i>Citrobacter amalonaticus</i> (clinical)                   | ATCC 25405    | Fluorescent   | Pale yellow | Transparent               | Transparent       |
| <i>Citrobacter braakii</i> (clinical)                        | ATCC 43162    | Fluorescent   | Yellow      | Purple                    | Pink              |
| <i>Citrobacter farmeri</i> (clinical)                        | ATCC 51112    | Fluorescent   | Pale yellow | Transparent               | Transparent       |
| <i>Citrobacter freundii</i> (food)                           | ATCC 6879     | Fluorescent   | Yellow      | Purple                    | Pink              |
| <i>Citrobacter freundii</i> (not available)                  | ATCC 8454     | Fluorescent   | Yellow      | Purple                    | Pink              |
| <i>Citrobacter freundii</i> (clinical)                       | ATCC 8090     | Fluorescent   | Yellow      | Purple                    | Pink              |
| <i>Citrobacter freundii</i> (environmental)                  | CCRI-14799    | Fluorescent   | Yellow      | Purple                    | Pink              |
| <i>Citrobacter freundii</i> (environmental)                  | CCRI-14827    | Fluorescent   | Pale yellow | –                         | –                 |
| <i>Citrobacter freundii</i> (environmental)                  | CCRI-14856    | Fluorescent   | Yellow      | Purple                    | Pink              |
| <i>Citrobacter gillenii</i> (clinical)                       | ATCC 51117    | Fluorescent   | Yellow      | Purple                    | Pink              |
| <i>Citrobacter koseri</i> (clinical)                         | ATCC 27028    | Fluorescent   | Pale yellow | Grey                      | Transparent       |
| <i>Citrobacter koseri</i> (clinical)                         | ATCC 27156    | Fluorescent   | Yellow      | Purple                    | Transparent       |
| <i>Citrobacter koseri</i> (clinical)                         | ATCC 29225    | Fluorescent   | Yellow      | Purple                    | Transparent       |
| <i>Citrobacter murliniae</i> (clinical)                      | ATCC 51641    | Fluorescent   | Yellow      | Purple                    | Transparent       |
| <i>Citrobacter sedlakii</i> (clinical)                       | ATCC 51115    | Fluorescent   | Yellow      | Grey                      | Transparent       |
| <i>Citrobacter sedlakii</i> (clinical)                       | ATCC 51493    | Fluorescent   | Yellow      | –                         | –                 |
| <i>Citrobacter werkmanii</i> (clinical)                      | ATCC 51114    | Fluorescent   | Yellow      | Purple                    | Transparent       |
| <i>Citrobacter youngae</i> (food)                            | ATCC 29935    | Fluorescent   | Yellow      | Purple                    | Transparent       |
| <i>Cronobacter muytjensii</i> (not available)                | ATCC 51329    | Fluorescent   | Yellow      | Purple                    | Transparent       |
| <i>Cronobacter sakazakii</i> (not available)                 | ATCC 29004    | Unfluorescent | Yellow      | Purple                    | Yellow            |
| <i>Cronobacter sakazakii</i> (clinical)                      | ATCC 29544    | Unfluorescent | Yellow      | Purple                    | Pink              |
| <i>Cronobacter sakazakii</i> (environmental)                 | CCRI-17037    | Fluorescent   | Yellow      | Purple                    | Beige             |
| <i>Enterobacter aerogenes</i> (clinical)                     | ATCC 13048    | Fluorescent   | Yellow      | Purple                    | Pink              |
| <i>Enterobacter aerogenes</i> (not available)                | ATCC 35029    | Fluorescent   | Yellow      | Purple                    | Pink              |
| <i>Enterobacter aerogenes</i> (not available)                | ATCC 51342    | Fluorescent   | Yellow      | Purple                    | Pink              |
| <i>Enterobacter amnigenus</i> (environmental)                | ATCC 33072    | Fluorescent   | Pale yellow | Purple                    | Transparent       |
| <i>Enterobacter asburiae</i> (clinical)                      | ATCC 35954    | Fluorescent   | Yellow      | Purple                    | Pink              |
| <i>Enterobacter asburiae</i> (clinical)                      | ATCC 35956    | Fluorescent   | Yellow      | Purple                    | Pink              |
| <i>Enterobacter cancerogenus</i> (clinical)                  | ATCC 33241    | Fluorescent   | Yellow      | Purple                    | Transparent       |
| <i>Enterobacter cancerogenus</i> (clinical)                  | ATCC 35317    | Fluorescent   | Yellow      | Purple                    | Transparent       |
| <i>Enterobacter cancerogenus</i> (environmental)             | ATCC 49817    | Fluorescent   | Yellow      | Purple                    | Transparent       |
| <i>Enterobacter cloacae</i> subsp. <i>cloacae</i> (clinical) | ATCC 13047    | Fluorescent   | Yellow      | Purple                    | Transparent       |
| <i>Enterobacter cloacae</i> subsp. <i>cloacae</i> (clinical) | ATCC 23355    | Fluorescent   | Yellow      | Purple                    | Transparent       |

(continued)

Table 1 | continued

| Strains (origin; n = 129)                                         | No. Reference | Test methods  |             |                           |                   |
|-------------------------------------------------------------------|---------------|---------------|-------------|---------------------------|-------------------|
|                                                                   |               | MI agar       | Collert®    | Chromocult coliform® agar | DC agar with BCIG |
| <i>Enterobacter cloacae</i> subsp. <i>cloacae</i> (clinical)      | ATCC 35588    | Fluorescent   | Yellow      | Purple                    | Transparent       |
| <i>Enterobacter cloacae</i> subsp. <i>cloacae</i> (environmental) | CCRI-17108    | Fluorescent   | Yellow      | Purple                    | Transparent       |
| <i>Enterobacter cloacae</i> subsp. <i>dissolvens</i> (food)       | ATCC 23373    | Fluorescent   | Yellow      | Purple                    | Transparent       |
| <i>Enterobacter gergoviae</i> (clinical)                          | ATCC 33028    | Fluorescent   | Pale yellow | Purple                    | Transparent       |
| <i>Enterobacter gergoviae</i> (clinical)                          | ATCC 33426    | Fluorescent   | Pale yellow | Purple                    | Transparent       |
| <i>Enterobacter gergoviae</i> (clinical)                          | ATCC 33428    | Fluorescent   | Pale yellow | Purple                    | Transparent       |
| <i>Enterobacter hormaechei</i> (clinical)                         | ATCC 49162    | –             | Yellow      | Purple                    | Transparent       |
| <i>Enterobacter hormaechei</i> (clinical)                         | ATCC 49163    | Fluorescent   | Pale yellow | Grey                      | Transparent       |
| <i>Enterobacter pyrinus</i> (environmental)                       | ATCC 49851    | Fluorescent   | Pale yellow | Pale pink                 | Transparent       |
| <i>Erwinia amylovora</i> (not available)                          | ATCC 14976    | –             | Transparent | –                         | –                 |
| <i>Escherichia blattae</i> (environmental)                        | ATCC 29907    | Unfluorescent | Transparent | Transparent               | Transparent       |
| <i>Escherichia fergusonii</i> (clinical)                          | ATCC 35469    | Fluorescent   | Pale yellow | Grey                      | Transparent       |
| <i>Escherichia hermannii</i> (clinical)                           | ATCC 33650    | –             | Pale yellow | Grey                      | Transparent       |
| <i>Escherichia vulneris</i> (food)                                | ATCC 29943    | Fluorescent   | Yellow      | Purple                    | Pale pink         |
| <i>Escherichia vulneris</i> (clinical)                            | ATCC 33821    | Fluorescent   | Pale yellow | Pale pink                 | Transparent       |
| <i>Escherichia vulneris</i> (clinical)                            | ATCC 33832    | Fluorescent   | Yellow      | Purple                    | Transparent       |
| <i>Ewingella americana</i> (clinical)                             | ATCC 33852    | Unfluorescent | Transparent | Transparent               | White             |
| <i>Ewingella americana</i> (clinical)                             | ATCC 33854    | Unfluorescent | Transparent | Transparent               | White             |
| <i>Hafnia alvei</i> (clinical)                                    | ATCC 13337    | –             | Transparent | –                         | –                 |
| <i>Hafnia alvei</i> (not available)                               | ATCC 25927    | Unfluorescent | Transparent | Beige                     | Transparent       |
| <i>Hafnia alvei</i> (clinical)                                    | ATCC 51873    | Fluorescent   | Pale yellow | Grey                      | Transparent       |
| <i>Hafnia alvei</i> (environmental)                               | CCRI-16651    | Unfluorescent | Transparent | Transparent               | Transparent       |
| <i>Klebsiella oxytoca</i> (clinical)                              | ATCC 13182    | Fluorescent   | Yellow      | Grey                      | Pink              |
| <i>Klebsiella oxytoca</i> (clinical)                              | ATCC 33496    | Fluorescent   | Yellow      | Grey                      | White             |
| <i>Klebsiella oxytoca</i> (clinical)                              | ATCC 41931    | Fluorescent   | Yellow      | Purple                    | Pale pink         |
| <i>Klebsiella pneumoniae</i> (clinical)                           | ATCC 27736    | Fluorescent   | Yellow      | Purple                    | Pink              |
| <i>Klebsiella pneumoniae</i> (environmental)                      | CCRI-17014    | Fluorescent   | Yellow      | Blue                      | Blue              |
| <i>Klebsiella pneumoniae</i> (environmental)                      | CCRI-17064    | –             | Transparent | –                         | –                 |
| <i>Klebsiella pneumoniae</i> (environmental)                      | CCRI-17074    | Fluorescent   | Yellow      | Grey                      | Transparent       |
| <i>Kluyvera ascorbata</i> (clinical)                              | ATCC 33433    | Fluorescent   | Yellow      | Purple                    | Pink              |
| <i>Kluyvera ascorbata</i> (not available)                         | ATCC 33434    | Unfluorescent | Yellow      | Purple                    | Pink              |
| <i>Kluyvera cryocrescens</i> (environmental)                      | ATCC 14239    | Fluorescent   | Yellow      | Purple                    | Pink              |
| <i>Kluyvera cryocrescens</i> (clinical)                           | ATCC 33435    | Unfluorescent | Yellow      | Purple                    | Pink              |
| <i>Kluyvera georgiana</i> (clinical)                              | ATCC 51603    | Fluorescent   | Yellow      | Purple                    | Pink              |
| <i>Kluyvera georgiana</i> (clinical)                              | ATCC 51702    | Fluorescent   | Yellow      | Purple                    | Beige             |
| <i>Kluyvera intermedia</i> (environmental)                        | ATCC 33110    | Fluorescent   | Transparent | Grey                      | Pink              |
| <i>Leclercia adecarboxylata</i> (environmental)                   | ATCC 23216    | Fluorescent   | Yellow      | Pink                      | Pink              |

(continued)

Table 1 | continued

| Strains (origin; n = 129)                                     | No. Reference | Test methods  |             |                           |                   |
|---------------------------------------------------------------|---------------|---------------|-------------|---------------------------|-------------------|
|                                                               |               | MI agar       | Collert®    | Chromocult coliform® agar | DC agar with BCIG |
| <i>Leclercia adecarboxylata</i> (clinical)                    | ATCC 27984    | Fluorescent   | Yellow      | Pink                      | Transparent       |
| <i>Moellerella wisconsensis</i> (clinical)                    | ATCC 35017    | Fluorescent   | Yellow      | Purple                    | Pink              |
| <i>Pantoea agglomerans</i> (clinical)                         | ATCC 27155    | Unfluorescent | Transparent | Transparent               | Transparent       |
| <i>Pantoea dispersa</i> (environmental)                       | ATCC 14589    | Unfluorescent | Transparent | Transparent               | Transparent       |
| <i>Providencia rettgeri</i> (not available)                   | ATCC 29944    | Unfluorescent | Transparent | Beige                     | White             |
| <i>Rahnella aquatilis</i> (environmental)                     | ATCC 33071    | Fluorescent   | Yellow      | Grey                      | Pink              |
| <i>Raoutella ornithinolytica</i> (clinical)                   | ATCC 31898    | Fluorescent   | Yellow      | Grey                      | White             |
| <i>Raoutella planticola</i> (environmental)                   | ATCC 33531    | Fluorescent   | Yellow      | Purple                    | Pink              |
| <i>Raoutella terrigena</i> (environmental)                    | ATCC 33257    | Fluorescent   | Pale yellow | Blue                      | White             |
| <i>Salmonella bongori</i> (not available)                     | ATCC 43975    | Fluorescent   | Yellow      | Grey                      | Transparent       |
| <i>Salmonella enterica</i> subsp. <i>enterica</i> (clinical)  | ATCC 14028    | Unfluorescent | Yellow      | Transparent               | Transparent       |
| <i>Salmonella enterica</i> subsp. <i>houtenae</i> (clinical)  | ATCC 43974    | Unfluorescent | Transparent | Pale yellow               | Transparent       |
| <i>Salmonella enterica</i> subsp. <i>salamae</i> (clinical)   | ATCC 43972    | Unfluorescent | Transparent | Transparent               | Transparent       |
| <i>Serratia entomophila</i> (environmental)                   | ATCC 43705    | Fluorescent   | Pale yellow | Pale yellow               | Transparent       |
| <i>Serratia ficaria</i> (environmental)                       | ATCC 33105    | Fluorescent   | Pale yellow | Transparent               | White             |
| <i>Serratia fonticola</i> (environmental)                     | ATCC 29844    | Fluorescent   | Transparent | Grey                      | Pink              |
| <i>Serratia grimesii</i> (not available)                      | ATCC 14460    | Fluorescent   | Yellow      | Transparent               | Transparent       |
| <i>Serratia liquefaciens</i> (food)                           | ATCC 27592    | Fluorescent   | Yellow      | Transparent               | Transparent       |
| <i>Serratia liquefaciens</i> (food)                           | ATCC 25641    | Fluorescent   | Pale yellow | Pale yellow               | Transparent       |
| <i>Serratia marcescens</i> (not available)                    | ATCC 8100     | Fluorescent   | Pale yellow | Transparent               | Transparent       |
| <i>Serratia marcescens</i> (clinical)                         | ATCC 29021    | Fluorescent   | Yellow      | Transparent               | Beige             |
| <i>Serratia marcescens</i> (not available)                    | ATCC 43862    | Fluorescent   | Yellow      | Pink                      | Pale pink         |
| <i>Serratia odorifera</i> (clinical)                          | ATCC 33077    | Fluorescent   | Yellow      | Grey                      | White             |
| <i>Serratia odorifera</i> (clinical)                          | ATCC 33132    | Fluorescent   | Yellow      | Grey                      | Beige             |
| <i>Serratia odorifera</i> (clinical)                          | ATCC 33133    | Fluorescent   | Yellow      | Pale pink                 | Transparent       |
| <i>Serratia plymuthica</i> (environmental)                    | ATCC 183      | Fluorescent   | Yellow      | Grey                      | White             |
| <i>Serratia proteamaculans</i> subsp. <i>quinovora</i> (food) | ATCC 33765    | Fluorescent   | Yellow      | Grey                      | White             |
| <i>Serratia rubidaea</i> (not available)                      | ATCC 27593    | Fluorescent   | Yellow      | Grey                      | Pink              |
| <i>Serratia rubidaea</i> (clinical)                           | ATCC 29023    | Fluorescent   | Yellow      | Grey                      | Pink              |
| <i>Shigella boydii</i> (clinical)                             | ATCC 9207     | -             | Transparent | Grey                      | Blue              |
| <i>Shigella dysenteriae</i> (clinical)                        | ATCC 11835    | Unfluorescent | Transparent | Transparent               | Transparent       |
| <i>Shigella flexneri</i> (clinical)                           | ATCC 12022    | Unfluorescent | Transparent | Transparent               | Transparent       |
| <i>Trabulsiella guamensis</i> (environmental)                 | ATCC 49490    | Fluorescent   | Yellow      | Transparent               | Transparent       |
| <i>Vibrio gazogenes</i> (environmental)                       | ATCC 43939    | Unfluorescent | Transparent | Transparent               | Transparent       |
| <i>Yersinia aldovae</i> (environmental)                       | ATCC 35236    | Unfluorescent | Transparent | Transparent               | Transparent       |
| <i>Yersinia aldovae</i> (food)                                | ATCC 35237    | -             | Transparent | -                         | -                 |
| <i>Yersinia bercovieri</i> (environmental)                    | ATCC 43970    | Fluorescent   | Transparent | Transparent               | Transparent       |

(continued)



Table 1 | continued

| Strains (origin; n = 129)                                              | No. Reference | Test methods   |                |                           |                   |
|------------------------------------------------------------------------|---------------|----------------|----------------|---------------------------|-------------------|
|                                                                        |               | MI agar        | Collert®       | Chromocult coliform® agar | DC agar with BCIG |
| <i>Yersinia enterocolitica</i> subsp. <i>enterocolitica</i> (clinical) | ATCC 9610     | –              | Transparent    | Transparent               | Transparent       |
| <i>Yersinia frederiksenii</i> (clinical)                               | ATCC 29912    | Fluorescent    | Pale yellow    | Transparent               | White             |
| <i>Yersinia frederiksenii</i> (environmental)                          | ATCC 33641    | Fluorescent    | Yellow         | Transparent               | Transparent       |
| <i>Yersinia intermedia</i> (clinical)                                  | ATCC 29909    | Unfluorescent  | Pale yellow    | –                         | –                 |
| <i>Yersinia intermedia</i> (clinical)                                  | ATCC 33647    | Fluorescent    | Pale yellow    | Transparent               | Transparent       |
| <i>Yersinia intermedia</i> (clinical)                                  | ATCC 33648    | Fluorescent    | Pale yellow    | Transparent               | Transparent       |
| <i>Yersinia kristensenii</i> (clinical)                                | ATCC 33638    | –              | Transparent    | Transparent               | –                 |
| <i>Yersinia pseudotuberculosis</i> (animal)                            | ATCC 13979    | Unfluorescent  | Transparent    | Transparent               | –                 |
| <i>Yersinia pseudotuberculosis</i> (animal)                            | ATCC 27802    | Unfluorescent  | Transparent    | Transparent               | Transparent       |
| <i>Yersinia pseudotuberculosis</i> (animal)                            | ATCC 29833    | –              | Transparent    | Transparent               | Transparent       |
| <i>Yersinia rohdei</i> (animal)                                        | ATCC 43380    | Unfluorescent  | Transparent    | Transparent               | –                 |
| <i>Yersinia rohdei</i> (animal)                                        | ATCC 43871    | Unfluorescent  | Transparent    | Transparent               | –                 |
| <i>Yersinia rohdei</i> (clinical)                                      | ATCC 43873    | Fluorescent    | Pale yellow    | Transparent               | –                 |
| <i>Yersinia ruckeri</i> (animal)                                       | ATCC 29473    | Unfluorescent  | Transparent    | Transparent               | Transparent       |
| <i>Yokenella regenburgei</i> (clinical)                                | ATCC 35313    | Fluorescent    | Transparent    | Beige                     | Transparent       |
| <i>Yokenella regenburgei</i> (clinical)                                | ATCC 43001    | Unfluorescent  | Transparent    | Transparent               | Transparent       |
| <i>Yokenella regenburgei</i> (clinical)                                | ATCC 43003    | Fluorescent    | Pale yellow    | Transparent               | Transparent       |
| Total positives:                                                       |               | 91/129 (70.5%) | 68/129 (52.7%) | 47/129 (36.4%)            | 30/129 (23.3%)    |

Shading = Positive results.

‘–’: no growth.

CCRI: Centre de recherche en infectiologie strain collection.

automated MicroScan Autoscan-4 system (Siemens Healthcare Diagnostic Inc., Newark, DE, USA) or a Vitek 32 system (bioMérieux SA, Marcy l'Étoile, France). Bacterial strains were grown from frozen stocks kept at  $-80^{\circ}\text{C}$  in Brucella medium (Beckton, Dickinson and Company, Mississauga, Ontario, Canada) containing 10% glycerol, and cultured on brain-heart infusion (BHI) agar. Three passages were performed prior to analysis of each strain with each culture-based method.

## Culture-based methods

### Preparation of the bacterial cell suspension

Non-*E. coli* total coliform and *E. coli* cells were grown to the logarithmic phase (0.5–0.6 optical density measured at 600

nm ( $\text{OD}_{600}$ )) in BHI broth and adjusted to a 0.5 McFarland standard (Fisher Scientific Company, Ottawa, Ontario, Canada), before being serially diluted ten-fold in phosphate-buffered saline (PBS; 137 mM NaCl, 6.4 mM  $\text{Na}_2\text{HPO}_4$ , 2.7 mM KCl, 0.88 mM  $\text{KH}_2\text{PO}_4$ , pH 7.4). An aliquot of the  $10^{-5}$  dilution was spiked in sterile reverse osmosis-purified water (resistivity of  $18\ \text{M}\Omega\text{-cm min}$  at  $25^{\circ}\text{C}$ ) to produce suspensions containing approximately 50 colony-forming units (CFU) per 100 mL of water. Bacterial counts were verified by filtering 100 mL of each spiked water sample through a Millipore membrane filter (47 mm diameter,  $0.45\ \mu\text{m}$  pore size; Millipore Corporation, Billerica, MA, USA) with a standard platform manifold (Millipore Corporation) followed by incubation on BHI agar for  $24 \pm 2\ \text{h}$  at  $35.0 \pm 0.5^{\circ}\text{C}$ . Tests to confirm the sterility of filter membranes and buffer used for rinsing the filtration apparatus were also performed.

**Table 2** | Ability of MI agar, Colilert®, Chromocult coliform® agar, and DC agar with BCIG culture-based methods to detect *E. coli* strains

| Strains (origin; n = 19)           | No. Reference    | Test methods  |               |                           |                   |
|------------------------------------|------------------|---------------|---------------|---------------------------|-------------------|
|                                    |                  | MI agar       | Colilert®     | Chromocult coliform® agar | DC agar with BCIG |
| <i>Escherichia coli</i> (clinical) | ATCC 11775       | Fluorescent   | Yellow        | Blue                      | Blue              |
| <i>Escherichia coli</i> (clinical) | ATCC 23511       | Fluorescent   | Yellow        | Blue                      | Blue              |
| <i>Escherichia coli</i> (clinical) | ATCC 35401       | Fluorescent   | Yellow        | Blue                      | Blue              |
| <i>Escherichia coli</i> (clinical) | ATCC 43886       | Fluorescent   | Yellow        | Blue/purple               | Pink              |
| <i>Escherichia coli</i> (clinical) | ATCC 43890       | Fluorescent   | Yellow        | Transparent               | Transparent       |
| <i>Escherichia coli</i> (clinical) | ATCC 43894       | Fluorescent   | Yellow        | Purple                    | Pink              |
| <i>Escherichia coli</i> (clinical) | ATCC 43895       | Fluorescent   | Yellow        | Purple                    | Pink              |
| <i>Escherichia coli</i> (clinical) | ATCC 43896       | Fluorescent   | Yellow        | Blue/purple               | Blue              |
| <i>Escherichia coli</i> (clinical) | LSPQ 2086        | Fluorescent   | Yellow        | Blue/purple               | Blue              |
| <i>Escherichia coli</i> (clinical) | LSPQ 2092        | Fluorescent   | Yellow        | Blue                      | Purple            |
| <i>Escherichia coli</i> (clinical) | LSPQ 2113        | Fluorescent   | Transparent   | Grey                      | –                 |
| <i>Escherichia coli</i> (clinical) | LSPQ 2115        | Fluorescent   | Yellow        | Blue                      | Blue              |
| <i>Escherichia coli</i> (clinical) | LSPQ 2117        | –             | Yellow        | Blue                      | Blue              |
| <i>Escherichia coli</i> (clinical) | LSPQ 2118        | Fluorescent   | Yellow        | Blue/purple               | Pink              |
| <i>Escherichia coli</i> (clinical) | LSPQ 2125        | Fluorescent   | Yellow        | Blue/purple               | Pink              |
| <i>Escherichia coli</i> (clinical) | LSPQ 2127        | Fluorescent   | Yellow        | Blue/purple               | Pink              |
| <i>Escherichia coli</i> (clinical) | LSPQ 3760        | Fluorescent   | Yellow        | Blue/purple               | Pink              |
| <i>Escherichia coli</i> (clinical) | LSPQ 3761        | Fluorescent   | Yellow        | Blue/purple               | Pink              |
| <i>Escherichia coli</i> (clinical) | LSPQ 3762        | Fluorescent   | Yellow        | Blue/purple               | Pink              |
|                                    | Total positives: | 18/19 (94.7%) | 18/19 (94.7%) | 17/19 (89.5%)             | 17/19 (89.5%)     |

Shading = Positive results.

'–': no growth.

## Membrane filtration method

The membrane filtration method was performed according to Maheux et al. (2009). Three 100 mL volumes were filtered on Millipore filters with a standard platform manifold. The first filter was incubated on MI agar (MI; BD, Franklin Lakes, NJ, USA), the second filter was incubated on Chromocult coliform® agar (Chromocult coliform®, Merk KGaA, Darmstadt, Germany), and the third filter was incubated on DC with BCIG agar (DC + BCIG; Neogen Corporation, Lansing, MI, USA) for  $24 \pm 2$  h at  $35.0 \pm 0.5$  °C, before determining colony counts and colour. Each preparation of MI, Chromocult coliform®, and DC + BCIG plates was tested for performance using positive and negative control strains (*Enterobacter aerogenes* ATCC 13048, *E. coli* ATCC 25922, and *Pseudomonas aeruginosa* ATCC 27853), as recommended by the manufacturer's labeled instructions and

the USEPA microbiology methods manual. Tests to confirm the sterility of the filter membranes and buffer used for rinsing the filtration apparatus were also performed (APHA 2005).

## Liquid culture method

For the detection of total coliform and *E. coli* strains with Colilert® (Colilert®, IDEXX Laboratories Canada Corp., Toronto, Ontario, Canada), all preparation, validation, storage and handling steps were performed according to the manufacturer's instructions. Briefly, one snap pack containing the Colilert® reagent was dissolved in 100 mL of spiked water samples. The solution was then added to a Quanti-tray®, sealed and incubated at  $35.0 \pm 0.5$  °C for  $24 \pm 2$  h prior to the identification of total coliform positive samples presenting yellow colouration and *E. coli* samples presenting both yellow colouration and fluorescence under UV light ( $\lambda = 365$  nm).

## Comparison using well water samples

### Sample collection

During the summer of 2012, 635 1-L raw well water samples from individual households were collected in the Québec City region (Canada). Each well water sample was divided into 100 mL subsamples for simultaneous testing by standard microbiological methods using MI, Chromocult coliform<sup>®</sup>, DC + BCIG, and Colilert<sup>®</sup> (see the 'Membrane filtration method' and 'Liquid culture method' sections).

### Statistical analysis

All individual results were recorded using Microsoft Excel 2010 software (Microsoft Corporation; Redmond, WA, USA) and the statistical analysis was performed using the SAS 9.3 program (SAS Institute Inc. 2011. Cary, NC).

To determine the ubiquity (ability to detect all or most total coliform strains) species identification by MicroScan Autoscan-4 system or the Vitek 32 system was used as a reference. Ubiquity was calculated by dividing the number of strains detected by the test by the number of total coliform strains tested.

All water samples were recorded as positive (1) or negative (0) for total coliforms and *E. coli*. No method was used as a reference to determine the specificity and sensitivity of a particular test for the detection of total coliforms and *E. coli*. All the methods were compared to each other. Sensitivity (true positive rate) was calculated by dividing the number of positive samples by Method No. 1 plus positive samples by Method No. 2 by the number of positive samples in Method No. 2. Specificity (true negative rate) was calculated by dividing the number of negative samples by Method No. 1 plus negative samples by Method No. 2 by the number of negative samples in Method No. 2.

McNemar's test was used to compare paired proportions with a 95% confidence interval. When the (two-sided) *p* value was less than 0.05, it was concluded that there is a significant difference between both methods.

An overly conservative measure of agreement, Cohen's kappa coefficient, was also used to measure the inter-rater agreement. Fleiss (1981) magnitude guidelines were used to

characterize the  $\kappa$  values (>0.75 = excellent, 0.40–0.75 = fair to good, and <0.40 = poor).

## RESULTS

### Analytical detection of total coliform strains

One hundred and twenty-nine total coliform strains (representing 76 species) from fecal and environmental settings were used to demonstrate the ability of MI agar (MI), Colilert<sup>®</sup>, Chromocult coliform<sup>®</sup> agar (Chromocult coliform<sup>®</sup>), and DC with BCIG agar (DC + BCIG) culture-based methods to detect various total coliform strains (ubiquity; Table 1). The results obtained showed that 91 (70.5%), 68 (52.7%), 47 (36.4%) and 30 (23.3%) of the 129 non-*E. coli* total coliform strains tested yielded a positive signal with the MI, Colilert<sup>®</sup>, Chromocult coliform<sup>®</sup>, and DC + BCIG methods, respectively. No relationship was observed between isolate origin and false-negative results.

### Analytical detection of *Escherichia coli* strains

Nineteen *E. coli* strains from fecal and environmental settings as well as from different geographic origins were used to demonstrate the ability of the four culture methods to detect various *E. coli* strains (ubiquity; Table 2). For confirmation purposes, all strains that presented negative results were also tested a second time with a different lot of kit/media. The results obtained showed that 18 (94.7%), 18 (94.7%), 17 (89.5%) and 17 (89.5%) of the 19 *E. coli* strains tested yielded a positive signal with MI, Colilert<sup>®</sup>, Chromocult coliform<sup>®</sup>, and DC + BCIG methods, respectively.

### Ability of MI, Colilert<sup>®</sup>, Chromocult coliform<sup>®</sup>, and DC + BCIG agar to detect total coliforms and *E. coli* from well water samples

Six hundred and thirty-five 1-L well water samples collected in the Québec City region during the summer of 2012 were divided into 100 mL subsamples for testing by all four methods to verify how these observations are transposed when real well water samples are tested. The MI, Colilert<sup>®</sup>, Chromocult coliform<sup>®</sup>, and DC + BCIG culture-based



**Table 3** | Ability of MI agar, Colilert<sup>®</sup>, Chromocult coliform<sup>®</sup> agar, and DC agar with BCIG culture-based methods to detect total coliforms and *E. coli* from potable water samples

|                               | MI agar<br>(CFU/100 mL) | Colilert <sup>®</sup><br>(MPN/100 mL) | Chromocult coliform <sup>®</sup> agar<br>(CFU/100 mL) | DC agar with BCIG<br>(CFU/100 mL) |
|-------------------------------|-------------------------|---------------------------------------|-------------------------------------------------------|-----------------------------------|
| <b>Total coliform</b>         |                         |                                       |                                                       |                                   |
| Positive result ([1-9])       | 155/635 (24.4%)         | 176/635 (26.3%)                       | 156/635 (24.6%)                                       | 163/635 (25.7%)                   |
| Positive result ( $\geq 10$ ) | 267/635 (42.0%)         | 161/635 (25.4%)                       | 256/635 (40.3%)                                       | 186/635 (29.3%)                   |
| Total                         | 422/635 (66.5%)         | 328/635 (51.7%)                       | 412/635 (64.9%)                                       | 349/635 (55.0%)                   |
| <b><i>E. coli</i></b>         |                         |                                       |                                                       |                                   |
| Total                         | 102/635 (16.1%)         | 94/635 (14.8%)                        | 110/635 (17.3%)                                       | 85/635 (13.4%)                    |

methods yielded a total coliform positive signal for 422 (66.5%), 328 (51.7%), 412 (63.9%) and 349 (55.0%) of 635 well water samples tested, respectively, while only 267 (42.0%), 161 (25.4%), 256 (40.3%) and 186 (29.3%) exceeded the concentration of 10 total coliform CFU/100 mL, respectively (Tables 3, 4 and 6). For each method, an *E. coli* positive signal was observed for 102 (16.1%), 94 (14.8%), 110 (17.3%) and 85 (13.4%), respectively, of the 635 well water samples tested (Tables 3, 5 and 7).

### Growth of atypical colonies

For the 635 1-L well water samples tested, 85 (13.3%) and 80 (12.6%) allowed the growth of more than 200 atypical colonies on the filter for Chromocult coliform<sup>®</sup> and DC + BICG

agar, respectively, whereas only six (0.9%) filters out of 635 contained more than 200 atypical colonies for the MI method.

## DISCUSSION

### Analytical detection of total coliform strains

In the present study, the ability of the four culture-based methods tested to detect total coliform strains was statistically different: MI agar (MI) presented the best detection level and DC with BCIG (DC + BCIG) agar the worst, with a difference of 47.2% between the two methods. Detection of total coliforms on the DC + BCIG method is not obvious. Indeed, contrary to the three other methods tested, the medium does not contain a chromogenic agent for  $\beta$ -galactosidase detection. It contains only a chromogenic agent for  $\beta$ -glucuronidase detection. Thus, on this medium, pink colonies are considered total coliforms. Therefore, contrary to the three other methods tested, identification tests of typical colonies should be conducted to confirm the results obtained. Similar to Maheux et al. (2008), the results of the present study lacked correlation between test methods based on the same enzymatic principle to recognize a strain as non-*E. coli* total coliform. Indeed, our results showed that there is no correlation between the four methods tested either within the same genera or the same species (Table 1).

In 2008, Maheux tested 33 reference and environmental non-*E. coli* total coliform strains (representing 26 species) to demonstrate the ability of MI, Colilert<sup>®</sup>, Chromocult coliform<sup>®</sup> agar (Chromocult coliform<sup>®</sup>) and Readycult<sup>®</sup>

**Table 4** | Comparison of methods for detection of total coliform presence in well water samples ( $n = 635$ )

| Method and results                          | No. of results by MI agar |     | No. of results by Colilert <sup>®</sup> |     | No. of results by Chromocult coliform <sup>®</sup> agar |     |
|---------------------------------------------|---------------------------|-----|-----------------------------------------|-----|---------------------------------------------------------|-----|
|                                             | +                         | -   | +                                       | -   | +                                                       | -   |
| <b>Colilert<sup>®</sup></b>                 |                           |     |                                         |     |                                                         |     |
| +                                           | 306                       | 23  |                                         |     |                                                         |     |
| -                                           | 116                       | 190 |                                         |     |                                                         |     |
| <b>Chromocult coliform<sup>®</sup> agar</b> |                           |     |                                         |     |                                                         |     |
| +                                           | 376                       | 36  | 303                                     | 109 |                                                         |     |
| -                                           | 46                        | 177 | 25                                      | 198 |                                                         |     |
| <b>DC agar with BCIG</b>                    |                           |     |                                         |     |                                                         |     |
| +                                           | 333                       | 20  | 290                                     | 63  | 324                                                     | 26  |
| -                                           | 90                        | 192 | 38                                      | 244 | 90                                                      | 190 |

**Table 5** | Comparison of methods for detection of *E. coli* presence in well water samples ( $n = 635$ )

| Method and results        | No. of results by MI agar |     | No. of results by Colilert® |     | No. of results by Chromocult coliform® agar |     |
|---------------------------|---------------------------|-----|-----------------------------|-----|---------------------------------------------|-----|
|                           | +                         | -   | +                           | -   | +                                           | -   |
| Colilert®                 |                           |     |                             |     |                                             |     |
| +                         | 74                        | 20  |                             |     |                                             |     |
| -                         | 28                        | 513 |                             |     |                                             |     |
| Chromocult coliform® agar |                           |     |                             |     |                                             |     |
| +                         | 81                        | 29  | 68                          | 42  |                                             |     |
| -                         | 21                        | 504 | 23                          | 502 |                                             |     |
| DC agar with BCIG         |                           |     |                             |     |                                             |     |
| +                         | 75                        | 13  | 63                          | 24  | 71                                          | 17  |
| -                         | 27                        | 520 | 32                          | 516 | 39                                          | 508 |

culture-based methods to detect various total coliform strains. They showed that the  $\beta$ -galactosidase of 15 (45.5%), 20 (60.6%), 19 (57.6%), and 19 (57.6%) of the total coliform strains tested was detected by the four methods, respectively. For confirmation purposes in this study, all strains that had presented negative results during testing by Maheux et al. (2008) were tested a second time with a different lot of kit/media. However, among the  $\beta$ -galactosidase-negative strains tested by Maheux et al. (2008; ATCC 43890, ATCC 43894, ATCC 43895, LSPQ 2127, LSPQ 3760, LSPQ 3761, and LSPQ 3762) on MI agar,  $\beta$ -galactosidase production was detected during this study. This observation seems to confirm the assumption suggesting that identification methods relying solely on the activity of a single enzyme are subject to a lack of

robustness and may lead to misinterpretations since enzymatic activity can be transient and highly regulated by environmental factors (Maheux et al. 2008).

### Analytical detection of *E. coli* strains

Based on the results obtained, the four culture-based methods tested are not statistically different using pure *E. coli* cultures. However, it should be noted that for each *E. coli* strain tested,  $\beta$ -glucuronidase production was detected with at least one of the four methods. Once again, this observation seems to confirm that enzymatic activity can be transient and regulated by environmental factors, including the composition of culture media.

### Ability of MI, Colilert®, Chromocult coliform®, and DC + BCIG agar to detect total coliforms and *E. coli* from well water samples

The MI method detected significantly more total coliform-positive well water samples than Colilert® and DC + BCIG agar (Table 6). For the detection of *E. coli*-positive water samples, all enzymatic culture-based methods tested were equivalent with the exception of DC + BCIG agar that detected statistically fewer *E. coli*-positive well water samples than the other three methods.

### Growth of atypical colonies

The MI method is more specific than the Chromocult coliform® and DC + BCIG agar methods since fewer atypical colonies grew on MI compared to the other two methods.

**Table 6** | Statistical analysis of the four chromogenic culture-based methods for the detection of total coliform in well water samples ( $n = 635$ )

| Methods                   | MI agar            |             |         |                        | Colilert®          |             |         |                        | Chromocult coliform® agar |             |         |                        |
|---------------------------|--------------------|-------------|---------|------------------------|--------------------|-------------|---------|------------------------|---------------------------|-------------|---------|------------------------|
|                           | Index of agreement | Cohen kappa | McNemar | $p$ value <sup>a</sup> | Index of agreement | Cohen kappa | McNemar | $p$ value <sup>a</sup> | Index of agreement        | Cohen kappa | McNemar | $p$ value <sup>a</sup> |
| Colilert®                 | 0.78               | 0.72        | 62.22   | <0.0001                |                    |             |         |                        |                           |             |         |                        |
| Chromocult coliform® agar | 0.87               | 0.85        | 1.22    | 0.2224                 | 0.79               | 0.73        | 52.66   | <0.0001                |                           |             |         |                        |
| DC agar with BCIG         | 0.83               | 0.79        | 44.55   | <0.0001                | 0.84               | 0.81        | 6.19    | <0.0001                | 0.82                      | 0.78        | 35.31   | <0.0001                |

<sup>a</sup>A  $p$  value of <0.05 is necessary to establish a statistically significant difference.

**Table 7** | Statistical analysis of the four chromogenic culture-based methods for the detection of *E. coli* in well water samples ( $n = 635$ )

| Methods                   | MI agar            |             |         |                             | Colilert®          |             |         |                             | Chromocult coliform® agar |             |         |                             |
|---------------------------|--------------------|-------------|---------|-----------------------------|--------------------|-------------|---------|-----------------------------|---------------------------|-------------|---------|-----------------------------|
|                           | Index of agreement | Cohen kappa | McNemar | <i>p</i> value <sup>a</sup> | Index of agreement | Cohen kappa | McNemar | <i>p</i> value <sup>a</sup> | Index of agreement        | Cohen kappa | McNemar | <i>p</i> value <sup>a</sup> |
| Colilert®                 | 0.92               | 0.92        | 1.33    | 0.1836                      |                    |             |         |                             |                           |             |         |                             |
| Chromocult coliform® agar | 0.92               | 0.91        | 1.28    | 0.2006                      | 0.90               | 0.89        | 5.55    | <0.0001                     |                           |             |         |                             |
| DC agar with BCIG         | 0.94               | 0.93        | 4.90    | <0.0001                     | 0.91               | 0.90        | 1.14    | 0.2542                      | 0.91                      | 0.90        | 8.64    | <0.0001                     |

<sup>a</sup>A *p* value of <0.05 is necessary to establish a statistically significant difference.

As a liquid culture method, the growth of atypical colonies could not be investigated for the Colilert® culture-based method.

### Time to result

In terms of time to result, all four methods tested comparably since they required 24 hours for results. However, contrary to MI, Colilert, and Chromocult coliform® methods, suspect total coliform colonies on DC + BCIG agar should be confirmed with additional tests.

### Ease of use

In terms of ease of use, the Colilert® method was the easiest to use. The unit-dosed packaging eliminates media preparation. Furthermore, there is no repeat testing due to clogged filters. Finally, contrary to other membrane filtration-based methods, its use does not require well-trained employees. The MI, Chromocult coliform®, and DC + BCIG agar methods provided comparable ease of use in terms of membrane filtration methods. Media must also be prepared and quality control carried out for each batch. Employee training is also more important than for

the Colilert® method. However, employees already using membrane filtration equipment can easily use these methods (Table 8).

### Affordability

In terms of affordability, the Chromocult coliform® and DC + BCIG agar are comparable. MI is approximately 30% more expensive than the two previous methods. Colilert® reactants are more expensive (six to 10 times more expensive than chromogenic membrane filtration-based reactants per water sample; Table 8). However, the cost associated with employees is higher for chromogenic membrane filtration-based methods than for Colilert® since the latter is much easier to use.

In water management, multiple parameters will influence the choice of an analytical method to assess drinking water. Despite the fact that MI, Colilert®, and Chromocult coliform® have been shown equivalent in terms of specificity and sensitivity, the ease of use and the cost will also influence the choice of a method. In this study, we addressed all these parameters to help authorities and analytical laboratories make a choice among all available methods for the purpose of their own needs.

**Table 8** | Comparison of MI agar, Colilert®, Chromocult coliform® agar, and DC agar with BCIG enzymatic culture-based methods in terms of ease of use and affordability

| Parameters    | MI agar                            | Colilert®                             | Chromocult coliform® agar             | DC agar with BCIG                     |
|---------------|------------------------------------|---------------------------------------|---------------------------------------|---------------------------------------|
| Ease of use   | Medium                             | Easy                                  | Medium                                | Medium                                |
| Affordability | 1–1.30 USD per sample <sup>a</sup> | 6.50–9.80 USD per sample <sup>a</sup> | 0.75–1.00 USD per sample <sup>a</sup> | 0.80–1.05 USD per sample <sup>a</sup> |

<sup>a</sup>Cost will vary with the size and with the quote obtained.

## CONCLUSION

We conducted a multiparametric comparison study of the MI agar, Colilert<sup>®</sup>, Chromocult coliform agar and DC with BCIG agar methods in terms of ubiquity and sensitivity using both pure cultures of bacteria and residential well water samples. We also compared their ability to limit the growth of atypical colonies, ease of use and affordability. To our knowledge, this is the first report on the comparison of these test methods using a pure culture panel of this size. We showed that, since environmental laboratories already possess the equipment for membrane filtration methods, the use of the MI agar method seems to be the best option for the assessment of drinking water quality by total coliform and *E. coli* detection even if it costs 30% more than other chromogenic membrane filtration methods. Indeed, MI agar is more cost-effective than Colilert<sup>®</sup> and more specific than the Chromocult coliform agar and DC with BCIG agar methods which showed more growth of atypical colonies. However, when no trained employee and/or no membrane filtration equipment are available, the Colilert<sup>®</sup> method should be preferred. The results obtained in the present study are applicable solely to drinking water samples. Results could differ with other types of water.

## ACKNOWLEDGEMENTS

We wish to thank Dr Steve Charette (IBIS; Institut de Biologie Intégrative et des Systèmes, Université Laval, Québec City (Quebec), Canada) for providing laboratory space and Dr Michel G. Bergeron (CRI; Centre de recherche en infectiologie, CHU de Québec, Québec City (Quebec), Canada) for providing the strains used in this study. This research project was funded in part by an Engage Grant (EG) 413660 from the Natural Sciences and Engineering Research Council of Canada (NSERC) and by the partners of the Research Chair on Drinking Water of Université Laval. The first author was supported by a postdoctoral fellowship from NSERC.

## REFERENCES

- APHA/AWWA/WEF 2005 *Standard Methods for the Examination of Water and Wastewater*. 21st edn, American Public Health Association/American Water Works Association/Water Environment Federation, Washington, DC, USA.
- Boubetra, A., Le Nestour, F., Allaert, C. & Feinberg, M. 2011 [Validation of alternative methods for the analysis of drinking water and their application to \*Escherichia coli\*](#). *Appl. Environ. Microbiol.* **77**, 3360–3367.
- Brenner, D. J., Fanning, G. R., Skerman, F. J. & Falkow, S. 1972 Polynucleotide sequence divergence among strains of *Escherichia coli* and closely related organisms. *J. Bacteriol.* **109**, 953–965.
- Brenner, K. P., Rankin, C. C., Roybal, Y. R., Stelma Jr., G. N., Scarpino, P. V. & Dufour, A. P. 1993 New medium for the simultaneous detection of total coliforms and *Escherichia coli* in water. *Appl. Environ. Microbiol.* **59**, 3534–3544.
- Brenner, K. P., Rankin, C. C., Sivaganesan, M. & Scarpino, P. V. 1996 Comparison of the recoveries of *Escherichia coli* and total coliforms from drinking water by the MI agar method and the U.S. Environmental Protection Agency-approved membrane filter method. *Appl. Environ. Microbiol.* **62**, 203–208.
- Burlingame, G. A., McElhaney, J., Bennett, M. & Pipes, W. O. 1984 Bacterial interference with coliform colony sheen production on membrane filters. *Appl. Environ. Microbiol.* **47**, 56–60.
- Chang, G. W., Brill, J. & Lum, R. 1989 Proportion of beta-D-glucuronidase-negative *Escherichia coli* in human fecal samples. *Appl. Environ. Microbiol.* **55**, 335–339.
- Clark, J. A. 1980 [The influence of increasing numbers of non-indicator organisms by the membrane filter and presence-absence test](#). *Can. J. Microbiol.* **26**, 827.
- Edberg, S. C., Allen, M. J. & Smith, D. B. 1988 National field evaluation of a defined substrate method for the simultaneous enumeration of total coliforms and *Escherichia coli* from drinking water: comparison with the standard multiple tube fermentation method. *Appl. Environ. Microbiol.* **54**, 1595–1601.
- Evans, T. M., LeChevallier, M. W., Waarvick, C. E. & Seidler, R. J. 1981 Coliform species recovered from untreated surface water and drinking water by the membrane filter, standard, and modified most-probable number techniques. *Appl. Environ. Microbiol.* **41**, 657–663.
- Feng, P. & Lampel, K. A. 1994 [Genetic analysis of \*uidA\* expression in enterohaemorrhagic \*Escherichia coli\* serotype O157:H7](#). *Microbiology* **140** (Pt 8), 2101–2107.
- Feng, P. C. & Hartman, P. A. 1982 Fluorogenic assays for immediate confirmation of *Escherichia coli*. *Appl. Environ. Microbiol.* **43**, 1320–1329.
- Fleiss, J. L. 1981 *Statistical methods for rates and proportions*. 2nd edn, John Wiley, New York, pp. 38–46.
- Government of Quebec 1 October 2013 *Environment Quality Act. Chapter Q-2, r. 40. Regulation Respecting the Quality of*

- Drinking Water*. [www2.publicationsduquebec.gouv.qc.ca/dynamicSearch/telecharge.php?type=2&file=//Q\\_2/Q2R40\\_A.htm](http://www2.publicationsduquebec.gouv.qc.ca/dynamicSearch/telecharge.php?type=2&file=//Q_2/Q2R40_A.htm).
- Hallas, G., Giglio, S., Capurso, V., Monis, P. T. & Grooby, W. L. 2008 Evaluation of chromogenic technologies for use in Australian potable water. *J. Appl. Microbiol.* **105**, 1138–1149.
- Horman, A. & Hanninen, M. L. 2006 Evaluation of the lactose Tergitol-7, m-Endo LES, Colilert® 18, ReadyCult Coliforms 100, Water-Check-100, 3MPetrifilm EC and DryCult Coliform test methods for detection of total coliforms and *Escherichia coli* in water samples. *Water Res.* **40**, 3249–3256.
- Landre, J. P., Gavriel, A. A. & Lamb, A. J. 1998 False-positive coliform reaction mediated by *Aeromonas* in the Colilert® defined substrate technology system. *Lett. Appl. Microbiol.* **26**, 352–354.
- Lupo, M. & Halpern, Y. S. 1970 Gene controlling L-glutamic acid decarboxylase synthesis in *Escherichia coli* K-12. *J. Bacteriol.* **103**, 382–386.
- Maheux, A. F., Huppé, V., Boissinot, M., Picard, F. J., Bissonnette, L., Bernier, J.-L. T. & Bergeron, M. G. 2008 Analytical limits of four beta-glucuronidase and beta-galactosidase-based commercial methods used to detect *Escherichia coli* and total coliforms. *J. Microbiol. Meth.* **75**, 506–514.
- Maheux, A. F., Picard, F. J., Boissinot, M., Huppé, V., Bissonnette, L., Bernier, J.-L. T., Cantin, P., Huletsky, A. & Bergeron, M. G. 2009 Analytical limits of three  $\beta$ -glucosidase-based commercial culture methods used in environmental microbiology, to detect enterococci. *Water Sci. Technol.* **60** (4), 943–955.
- Martins, M. T., Rivera, I. G., Clark, D. L., Stewart, M. H., Wolfe, R. L. & Olson, B. H. 1993 Distribution of *uidA* gene sequences in *Escherichia coli* isolates in water sources and comparison with the expression of beta-glucuronidase activity in 4-methylumbelliferyl-beta-D-glucuronide media. *Appl. Environ. Microbiol.* **59**, 2271–2276.
- Mavridou, A., Smeti, E., Mandilara, G., Mandilara, G., Boufa, P., Vagiona-Arvanitidou, M., Vantarakis, A., Vassilandonopoulou, G., Pappa, O., Roussia, V., Tzouanopoulos, A., Livadara, M., Aisopou, I., Maraka, V., Nikolaou, E. & Mandilara, G. 2010 Equivalency testing of TTC Tergitol 7 agar (ISO 9308-1:2000) with five culture media for the detection of *E. coli* in water samples in Greece. *Water Sci. Technol.* **61**, 67–76.
- Means, E. G. & Olson, B. H. 1981 Coliform inhibition by bacteriocin-like substances in drinking water distribution systems. *Appl. Environ. Microbiol.* **42**, 506–512.
- Olstadt, J., Schauer, J. J., Standridge, J. & Kluender, S. 2007 A comparison of ten USEPA approved total coliform/*E. coli* tests. *J. Water Health* **5**, 267–282.
- Pitkanen, T., Paakkari, P., Miettinen, I. T., Heinonen-Tanski, H., Paulin, L. & Hanninen, M. L. 2007 Comparison of media for enumeration of coliform bacteria and *Escherichia coli* in non-disinfected water. *J. Microbiol. Meth.* **68**, 522–529.
- Rice, E. W., Allen, M. J. & Edberg, S. C. 1990 Efficacy of beta-glucuronidase assay for identification of *Escherichia coli* by the defined-substrate technology. *Appl. Environ. Microbiol.* **56**, 1203–1205.
- Rice, E. W., Allen, M. J., Brenner, D. J. & Edberg, S. C. 1991 Assay for beta-glucuronidase in species of the genus *Escherichia* and its applications for drinking-water analysis. *Appl. Environ. Microbiol.* **57**, 592–595.
- Rice, E. W., Johnson, C. H., Dunnigan, M. E. & Reasoner, D. J. 1993 Rapid glutamate decarboxylase assay for detection of *Escherichia coli*. *Appl. Environ. Microbiol.* **59**, 4347–4349.
- Seidler, R. J., Evans, T. M., Kaufman, J. R. & LeChevalier, M. W. 1981 Limitations of standard coliform enumeration techniques. *J. AWWA* **73**, 538–542.
- Shadix, L. C. & Rice, E. W. 1991 Evaluation of beta-glucuronidase assay for the detection of *Escherichia coli* from environmental waters. *Can. J. Microbiol.* **37**, 908–911.

First received 18 June 2014; accepted in revised form 16 September 2014. Available online 9 October 2014
